# Supplementary material for: Quantitative Analysis of the Human Semen Phosphorometabolome by 31P-NMR
Source: MDPI journal article supplement (doi:10.3390/ijms25031682), 2024-01-30
Supplement: s1 [file s1]

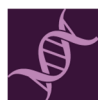

## Supplementary Materials

**Table S1:** Metabolites assigned in the ejaculates, seminal plasma and spermatozoa from human samples. Note: TCA= tricarboxylic acid cycle; PPP= pentose phosphate pathway.

| NMR             | Metabolite                                               | Abbreviation    | Metabolism     |
|-----------------|----------------------------------------------------------|-----------------|----------------|
| <sup>1</sup> H  | Choline                                                  | CHO             | Lipid          |
|                 | Citrate                                                  | CIT             | TCA            |
|                 | Tyrosine                                                 | Tyr             | Amino acid     |
|                 | Glutamine                                                | Gln             | Amino acid     |
|                 | Phenylalanine                                            | Phe             | Amino acid     |
|                 | Lactate                                                  | LAC             | Glycolysis     |
| <sup>31</sup> P | Glycerophosphoinositol                                   | GPI             | Lipid          |
|                 | Glycerophosphoethanolamine                               | GPE             | Lipid          |
|                 | Glycerophospho(N-biotin)ethanolamine                     | GP(N-biotin)E   | Lipid          |
|                 | Glycerophospho(monomethyl)ethanolamine                   | GP(monomethyl)E | Lipid          |
|                 | Glycerophospho(dimethyl)ethanolamine                     | GP(dimethyl)E   | Lipid          |
|                 | Phosphocholine                                           | PCh             | Lipid          |
|                 | Glycerophosphocholine                                    | GPC             | Lipid          |
|                 | Glucose 1-phosphate                                      | G1P             | Glycogenolysis |
|                 | Glucose 6-phosphate                                      | G6P             | Glycolysis     |
|                 | Sedoheptulose 7-phosphate and Fructose 1,6-bisphosphate  | S7P&FBP         | PPP/Glycolysis |
|                 | 6-Phosphogluconic acid                                   | 6PG             | PPP            |
|                 | Acetyl phosphate                                         | AcP             | Other          |
|                 | Xylulose 5-phosphate                                     | X5P             | PPP            |
|                 | Nicotinamide adenine dinucleotide phosphate reduced form | NADPH           | Energy         |
|                 | Nucleotide monophosphate                                 | NMP             | Nucleotide     |
|                 | Cyclic nucleotide monophosphate                          | NMPc            | Nucleotide     |
|                 | Phosphodiester unknown 1                                 | PDE1            | Unknown        |
|                 | Phosphodiester unknown 2                                 | PDE2            | Unknown        |
|                 | Phosphodiester unknown 3                                 | PDE3            | Unknown        |
|                 | Phosphodiester unknown 4                                 | PDE4            | Unknown        |

**Table S2:** Complete list of information of each metabolite concentration in the seminal plasma (SP) samples.

| Metabolite    | Seminal plasma samples (nmol/μL) |      |      |       |       |       |       |       |       |       |                               |      |      |       |       |       |       |       |       |  |
|---------------|----------------------------------|------|------|-------|-------|-------|-------|-------|-------|-------|-------------------------------|------|------|-------|-------|-------|-------|-------|-------|--|
|               | Donors with normozoospermia      |      |      |       |       |       |       |       |       |       | Donors with asthenozoospermia |      |      |       |       |       |       |       |       |  |
|               | Mean                             | SEM  | STD  | 1     | 2     | 3     | 4     | 5     | 6     | 7     | Mean                          | SEM  | STD  | 1     | 2     | 3     | 4     | 5     | 6     |  |
| CHO *         | 25.05                            | 2.38 | 6.30 | 18.57 | 27.23 | 30.16 | 30.15 | 27.21 | 28.18 | 13.88 | 16.00                         | 2.57 | 6.30 | 25.89 | 18.06 | 15.66 | 17.64 | 11.04 | 7.68  |  |
| Citrate       | 18.48                            | 0.72 | 1.91 | 18.86 | 19.45 | 17.50 | 15.69 | 18.12 | 21.87 | 17.90 | 19.38                         | 0.92 | 2.25 | 23.40 | 19.81 | 18.22 | 16.92 | 18.19 | 19.70 |  |
| Tyr *         | 5.34                             | 0.43 | 1.14 | 7.05  | 5.45  | 4.78  | 5.25  | 5.92  | 5.64  | 3.32  | 3.64                          | 0.57 | 1.39 | 5.11  | 1.78  | 3.45  | 5.17  | 3.91  | 2.40  |  |
| LAC           | 3.72                             | 1.07 | 2.82 | 2.89  | 2.70  | 1.81  | 2.41  | 3.09  | 3.13  | 10.03 | 3.06                          | 0.31 | 0.77 | 2.72  | 2.10  | 3.68  | 2.46  | 4.12  | 3.30  |  |
| Gln           | 2.36                             | 0.05 | 0.14 | 2.37  | 2.38  | 2.33  | 2.40  | 2.08  | 2.51  | 2.48  | 2.43                          | 0.04 | 0.09 | 2.45  | 2.44  | 2.38  | 2.59  | 2.37  | 2.33  |  |
| Phe*          | 2.28                             | 0.20 | 0.52 | 2.83  | 2.35  | 2.18  | 2.38  | 2.45  | 2.56  | 1.20  | 1.53                          | 0.27 | 0.67 | 2.15  | 0.65  | 1.28  | 2.41  | 1.62  | 1.07  |  |
| GPC           | 9.85                             | 1.83 | 4.84 | 12.12 | 7.52  | 6.26  | 8.03  | 7.35  | 7.66  | 19.99 | 8.93                          | 1.30 | 3.19 | 9.64  | 9.71  | 3.65  | 7.64  | 13.37 | 9.55  |  |
| GPI           | 1.82                             | 0.17 | 0.45 | 1.39  | 2.71  | 1.40  | 1.89  | 1.64  | 1.80  | 1.91  | 1.20                          | 0.25 | 0.61 | 1.85  | 0.86  | 0.44  | 1.91  | 1.39  | 0.74  |  |
| NMP           | 1.10                             | 0.26 | 0.68 | 0.19  | 1.51  | 1.69  | 1.27  | 1.51  | 1.46  | 0.05  | 1.10                          | 0.21 | 0.51 | 1.46  | 1.71  | 0.90  | 1.47  | 0.56  | 0.51  |  |
| GP(dimethyl)E | 0.67                             | 0.05 | 0.13 | 0.59  | 0.76  | 0.80  | 0.47  | 0.59  | 0.83  | 0.63  | 0.59                          | 0.04 | 0.10 | 0.61  | 0.58  | 0.66  | 0.38  | 0.64  | 0.64  |  |
| GPE           | 0.49                             | 0.17 | 0.44 | 0.59  | 0.36  | 0.27  | 0.21  | 0.24  | 0.33  | 1.45  | 0.48                          | 0.13 | 0.32 | 0.26  | 0.63  | 0.23  | 0.20  | 1.01  | 0.55  |  |
| G1P           | 0.20                             | 0.05 | 0.13 | 0.29  | 0.13  | 0.13  | 0.12  | 0.12  | 0.15  | 0.45  | 0.39                          | 0.11 | 0.26 | 0.11  | 0.34  | 0.39  | 0.12  | 0.76  | 0.59  |  |
| G6P           | 0.37                             | 0.07 | 0.19 | 0.08  | 0.35  | 0.32  | 0.32  | 0.35  | 0.43  | 0.71  | 0.18                          | 0.06 | 0.14 | 0.31  | 0.32  | 0.02  | 0.28  | 0.08  | 0.06  |  |
| Pcho *        | 0.05                             | 0.01 | 0.02 | 0.03  | 0.04  | 0.04  | 0.04  | 0.04  | 0.04  | 0.09  | 0.53                          | 0.44 | 1.07 | 0.05  | 2.70  | 0.25  | 0.04  | 0.07  | 0.06  |  |
| S7P&FBP       | 0.17                             | 0.04 | 0.10 | 0.35  | 0.17  | 0.12  | 0.13  | 0.16  | 0.21  | 0.03  | 0.09                          | 0.03 | 0.07 | 0.19  | 0.05  | 0.04  | 0.17  | 0.04  | 0.04  |  |
| PDE2          | 0.08                             | 0.01 | 0.02 | 0.09  | 0.09  | 0.08  | 0.05  | 0.09  | 0.07  | 0.10  | 0.07                          | 0.02 | 0.04 | 0.07  | 0.09  | 0.05  | 0.05  | 0.14  | 0.04  |  |

|                   |       |       |       |      |      |      |      |      |      |      |       |       |       |      |      |      |      |      |      |
|-------------------|-------|-------|-------|------|------|------|------|------|------|------|-------|-------|-------|------|------|------|------|------|------|
| 6PG               | 0.06  | 0.01  | 0.03  | 0.04 | 0.07 | 0.06 | 0.05 | 0.07 | 0.11 | 0.03 | 0.06  | 0.01  | 0.03  | 0.06 | 0.08 | 0.05 | 0.06 | 0.02 | 0.10 |
| NADPH             | 0.054 | 0.015 | 0.041 | 0.09 | 0.03 | 0.03 | 0.02 | 0.03 | 0.05 | 0.13 | 0.047 | 0.010 | 0.024 | 0.03 | 0.08 | 0.02 | 0.03 | 0.07 | 0.05 |
| PDE4              | 0.054 | 0.012 | 0.030 | 0.08 | 0.03 | 0.05 | 0.03 | 0.05 | 0.03 | 0.11 | 0.043 | 0.007 | 0.018 | 0.05 | 0.04 | 0.01 | 0.05 | 0.05 | 0.06 |
| GP(N-biotin)E     | 0.050 | 0.007 | 0.018 | 0.03 | 0.05 | 0.03 | 0.04 | 0.06 | 0.06 | 0.08 | 0.035 | 0.008 | 0.021 | 0.04 | 0.03 | 0.01 | 0.02 | 0.04 | 0.07 |
| PDE1              | 0.046 | 0.003 | 0.008 | 0.05 | 0.04 | 0.04 | 0.04 | 0.05 | 0.06 | 0.04 | 0.038 | 0.004 | 0.010 | 0.04 | 0.04 | 0.04 | 0.02 | 0.05 | 0.04 |
| AcP               | 0.026 | 0.004 | 0.010 | 0.01 | 0.03 | 0.04 | 0.02 | 0.03 | 0.03 | 0.02 | 0.030 | 0.007 | 0.018 | 0.02 | 0.04 | 0.01 | 0.02 | 0.06 | 0.03 |
| NMPc              | 0.029 | 0.005 | 0.012 | 0.01 | 0.04 | 0.04 | 0.03 | 0.04 | 0.02 | 0.02 | 0.023 | 0.004 | 0.010 | 0.04 | 0.02 | 0.01 | 0.03 | 0.02 | 0.02 |
| X5P               | 0.020 | 0.000 | 0.000 | 0.02 | 0.02 | 0.02 | 0.02 | 0.02 | 0.02 | 0.02 | 0.020 | 0.000 | 0.000 | 0.02 | 0.02 | 0.02 | 0.02 | 0.02 | 0.02 |
| GP(monomethyl)E   | 0.026 | 0.006 | 0.017 | 0.01 | 0.03 | 0.02 | 0.03 | 0.04 | 0.05 | 0.00 | 0.012 | 0.006 | 0.015 | 0.03 | 0.00 | 0.00 | 0.03 | 0.01 | 0.00 |
| PDE3              | 0.010 | 0.000 | 0.000 | 0.01 | 0.01 | 0.01 | 0.01 | 0.01 | 0.01 | 0.01 | 0.010 | 0.000 | 0.000 | 0.01 | 0.01 | 0.01 | 0.01 | 0.01 | 0.01 |
| Semen volume (mL) | 3.071 | 0.561 | 1.484 | 2.00 | 3.00 | 4.00 | 6.00 | 2.00 | 2.50 | 2.00 | 3.17  | 0.38  | 0.93  | 3.50 | 4.00 | 1.50 | 4.00 | 3.00 | 3.00 |

**Table S3:** Complete list of information of each metabolite concentration in unprocessed semen samples. Note: ND= no data.

| Whole semen samples (nmol/μL) |       |      |      |    |       |       |       |       |       |       |                               |      |      |       |    |       |       |       |       |  |
|-------------------------------|-------|------|------|----|-------|-------|-------|-------|-------|-------|-------------------------------|------|------|-------|----|-------|-------|-------|-------|--|
| Donors with normozoospermia   |       |      |      |    |       |       |       |       |       |       | Donors with asthenozoospermia |      |      |       |    |       |       |       |       |  |
| Metabolite                    | Mean  | SEM  | STD  | 1  | 2     | 3     | 4     | 5     | 6     | 7     | Mean                          | SEM  | STD  | 1     | 2  | 3     | 4     | 5     | 6     |  |
| CHO *                         | 27.07 | 2.94 | 7.21 | ND | 34.60 | 29.37 | 22.92 | 31.17 | 29.79 | 14.55 | 16.41                         | 3.39 | 7.59 | 28.12 | ND | 14.90 | 19.13 | 10.08 | 9.82  |  |
| Citrate                       | 26.20 | 1.91 | 4.67 | ND | 23.86 | 32.17 | 23.91 | 31.37 | 20.23 | 25.63 | 22.09                         | 1.45 | 3.25 | 20.82 | ND | 21.02 | 18.24 | 23.51 | 26.85 |  |
| Tyr *                         | 5.70  | 0.57 | 1.39 | ND | 6.22  | 5.94  | 5.05  | 7.85  | 5.48  | 3.63  | 3.53                          | 0.46 | 1.04 | 4.94  | ND | 2.91  | 4.32  | 2.92  | 2.57  |  |
| Gln                           | 4.11  | 0.51 | 1.25 | ND | 4.95  | 5.17  | 4.14  | 5.17  | 2.25  | 2.95  | 3.06                          | 0.58 | 1.29 | 1.32  | ND | 4.16  | 2.06  | 3.63  | 4.12  |  |
| LAC                           | 4.03  | 1.34 | 3.28 | ND | 2.36  | 2.09  | 4.38  | 2.22  | 2.63  | 10.50 | 3.15                          | 0.49 | 1.11 | 1.67  | ND | 3.29  | 2.47  | 3.84  | 4.47  |  |
| Phe *                         | 2.21  | 0.22 | 0.54 | ND | 2.82  | 1.88  | 2.14  | 2.79  | 2.21  | 1.42  | 1.57                          | 0.26 | 0.58 | 2.45  | ND | 1.19  | 1.86  | 1.25  | 1.10  |  |
| GPC                           | 9.06  | 1.18 | 2.88 | ND | 8.13  | 6.65  | 10.34 | 7.95  | 6.97  | 14.32 | 9.09                          | 1.01 | 2.27 | 10.74 | ND | 7.52  | 8.41  | 12.11 | 6.68  |  |
| GP(dimethyl)E                 | 0.70  | 0.02 | 0.05 | ND | 0.67  | 0.73  | 0.68  | 0.65  | 0.79  | 0.69  | 0.69                          | 0.03 | 0.07 | 0.73  | ND | 0.71  | 0.57  | 0.70  | 0.72  |  |
| GPE                           | 0.69  | 0.09 | 0.22 | ND | 0.78  | 0.73  | 0.66  | 0.67  | 0.32  | 0.98  | 0.64                          | 0.07 | 0.15 | 0.61  | ND | 0.49  | 0.66  | 0.88  | 0.54  |  |
| NMP                           | 0.57  | 0.10 | 0.25 | ND | 0.80  | 0.74  | 0.61  | 0.67  | 0.48  | 0.10  | 0.78                          | 0.15 | 0.35 | 0.75  | ND | 1.32  | 0.87  | 0.52  | 0.45  |  |
| GPI                           | 0.43  | 0.14 | 0.34 | ND | 0.22  | 0.31  | 0.60  | 0.22  | 0.18  | 1.06  | 0.71                          | 0.24 | 0.53 | 0.22  | ND | 0.70  | 0.16  | 1.27  | 1.22  |  |
| G6P                           | 0.59  | 0.07 | 0.16 | ND | 0.65  | 0.74  | 0.47  | 0.79  | 0.38  | 0.53  | 0.38                          | 0.17 | 0.39 | 0.70  | ND | 0.13  | 0.90  | 0.13  | 0.06  |  |
| G1P                           | 0.09  | 0.01 | 0.04 | ND | 0.11  | 0.10  | 0.02  | 0.10  | 0.11  | 0.11  | 0.46                          | 0.25 | 0.55 | 0.09  | ND | 0.34  | 0.10  | 1.42  | 0.33  |  |
| PCho                          | 0.13  | 0.02 | 0.04 | ND | 0.15  | 0.18  | 0.13  | 0.14  | 0.14  | 0.05  | 0.19                          | 0.07 | 0.16 | 0.12  | ND | 0.47  | 0.14  | 0.10  | 0.13  |  |
| S7P&FBP                       | 0.11  | 0.01 | 0.04 | ND | 0.13  | 0.13  | 0.11  | 0.13  | 0.13  | 0.04  | 0.09                          | 0.02 | 0.05 | 0.13  | ND | 0.12  | 0.13  | 0.04  | 0.04  |  |
| PDE1                          | 0.09  | 0.01 | 0.03 | ND | 0.12  | 0.12  | 0.09  | 0.07  | 0.05  | 0.08  | 0.08                          | 0.00 | 0.01 | 0.08  | ND | 0.09  | 0.08  | 0.09  | 0.08  |  |
| 6PG                           | 0.07  | 0.01 | 0.02 | ND | 0.07  | 0.07  | 0.08  | 0.07  | 0.07  | 0.03  | 0.07                          | 0.01 | 0.03 | 0.07  | ND | 0.11  | 0.07  | 0.02  | 0.09  |  |

|                      |      |      |      |    |      |      |      |      |      |      |      |      |      |      |    |      |      |      |      |
|----------------------|------|------|------|----|------|------|------|------|------|------|------|------|------|------|----|------|------|------|------|
| PDE2                 | 0.06 | 0.01 | 0.02 | ND | 0.05 | 0.05 | 0.09 | 0.05 | 0.04 | 0.09 | 0.08 | 0.01 | 0.03 | 0.07 | ND | 0.10 | 0.09 | 0.10 | 0.04 |
| NADPH                | 0.05 | 0.01 | 0.01 | ND | 0.05 | 0.05 | 0.05 | 0.04 | 0.05 | 0.08 | 0.04 | 0.01 | 0.02 | 0.04 | ND | 0.07 | 0.03 | 0.06 | 0.02 |
| PDE4                 | 0.05 | 0.01 | 0.01 | ND | 0.04 | 0.04 | 0.04 | 0.06 | 0.04 | 0.07 | 0.04 | 0.01 | 0.01 | 0.04 | ND | 0.03 | 0.03 | 0.04 | 0.06 |
| NMPc                 | 0.04 | 0.01 | 0.02 | ND | 0.04 | 0.06 | 0.03 | 0.04 | 0.04 | 0.01 | 0.04 | 0.01 | 0.02 | 0.06 | ND | 0.02 | 0.04 | 0.01 | 0.06 |
| GP(N-biotin)E        | 0.05 | 0.00 | 0.01 | ND | 0.04 | 0.05 | 0.04 | 0.06 | 0.05 | 0.05 | 0.04 | 0.01 | 0.02 | 0.05 | ND | 0.02 | 0.04 | 0.03 | 0.06 |
| PDE3                 | 0.03 | 0.00 | 0.01 | ND | 0.04 | 0.02 | 0.03 | 0.03 | 0.03 | 0.03 | 0.03 | 0.00 | 0.00 | 0.03 | ND | 0.03 | 0.03 | 0.03 | 0.03 |
| GP(monome-<br>thyl)E | 0.04 | 0.01 | 0.02 | ND | 0.05 | 0.05 | 0.03 | 0.05 | 0.05 | 0.01 | 0.03 | 0.01 | 0.02 | 0.05 | ND | 0.01 | 0.05 | 0.01 | 0.01 |
| AcP                  | 0.03 | 0.00 | 0.01 | ND | 0.03 | 0.02 | 0.03 | 0.04 | 0.02 | 0.02 | 0.04 | 0.01 | 0.01 | 0.03 | ND | 0.03 | 0.03 | 0.06 | 0.04 |
| X5P                  | 0.02 | 0.00 | 0.00 | ND | 0.02 | 0.02 | 0.02 | 0.02 | 0.02 | 0.02 | 0.02 | 0.00 | 0.00 | 0.02 | ND | 0.02 | 0.02 | 0.02 | 0.02 |

**Table S4:** Complete list of information of each metabolite concentration in the spermatozoa samples (CELL) analyzed from donors with normozoospermia.

|     |                 | Spermatozoa samples (nmol/Millions of cells) |       |       |       |       |       |       |
|-----|-----------------|----------------------------------------------|-------|-------|-------|-------|-------|-------|
|     |                 | Donors with normozoospermia                  |       |       |       |       |       |       |
| NMR | Metabolite      | 1                                            | 2     | 3     | 4     | 5     | 6     | 7     |
| 1H  | Citrate         | 37.02                                        | 13.44 | 11.78 | 20.97 | 18.18 | 31.18 | 16.59 |
| 1H  | CHO             | 15.18                                        | 12.22 | 13.67 | 20.63 | 12.79 | 27.20 | 12.47 |
| 1H  | Tyr             | 5.10                                         | 2.34  | 3.06  | 2.80  | 2.99  | 7.48  | 2.98  |
| 1H  | LAC             | 7.25                                         | 1.07  | 1.17  | 1.65  | 2.88  | 3.05  | 9.23  |
| 1H  | Gln             | 6.21                                         | 1.69  | 2.45  | 3.21  | 2.80  | 4.63  | 2.57  |
| 1H  | Phe             | 1.95                                         | 1.16  | 1.89  | 1.95  | 1.79  | 3.53  | 1.27  |
| 31P | GPC             | 6.50                                         | 2.74  | 2.97  | 4.14  | 4.53  | 9.88  | 4.20  |
| 31P | NMP             | 1.01                                         | 1.40  | 1.59  | 1.67  | 1.82  | 4.28  | 0.16  |
| 31P | S7P&FBP         | 0.03                                         | 0.53  | 0.56  | 0.89  | 0.54  | 1.28  | 0.00  |
| 31P | GPE             | 0.29                                         | 0.30  | 0.24  | 0.37  | 0.31  | 0.48  | 0.24  |
| 31P | G1P             | 0.13                                         | 0.34  | 0.13  | 0.43  | 0.29  | 0.95  | 0.10  |
| 31P | GPI             | 0.49                                         | 0.19  | 0.16  | 0.28  | 0.28  | 0.28  | 0.41  |
| 31P | G6P             | 0.07                                         | 0.15  | 0.15  | 0.24  | 0.11  | 0.33  | 0.04  |
| 31P | PCho            | 0.16                                         | 0.06  | 0.05  | 0.07  | 0.07  | 0.13  | 0.03  |
| 31P | PDE4            | 0.03                                         | 0.07  | 0.07  | 0.09  | 0.05  | 0.15  | 0.03  |
| 31P | PDE3            | 0.13                                         | 0.05  | 0.05  | 0.07  | 0.07  | 0.10  | 0.06  |
| 31P | PDE2            | 0.03                                         | 0.03  | 0.05  | 0.09  | 0.07  | 0.10  | 0.03  |
| 31P | GP(dimethyl)E   | 0.10                                         | 0.05  | 0.03  | 0.06  | 0.05  | 0.08  | 0.04  |
| 31P | GP(N-biotin)E   | 0.00                                         | 0.03  | 0.05  | 0.04  | 0.05  | 0.10  | 0.01  |
| 31P | X5P             | 0.07                                         | 0.02  | 0.02  | 0.04  | 0.03  | 0.05  | 0.03  |
| 31P | PDE1            | 0.07                                         | 0.02  | 0.02  | 0.04  | 0.03  | 0.05  | 0.03  |
| 31P | 6PG             | 0.03                                         | 0.03  | 0.02  | 0.04  | 0.03  | 0.05  | 0.00  |
| 31P | NMPc            | 0.00                                         | 0.02  | 0.02  | 0.06  | 0.02  | 0.05  | 0.00  |
| 31P | AcP             | 0.00                                         | 0.02  | 0.02  | 0.04  | 0.02  | 0.03  | 0.01  |
| 31P | GP(monomethyl)E | 0.03                                         | 0.01  | 0.02  | 0.02  | 0.02  | 0.03  | 0.00  |
| 31P | NADPH           | 0.03                                         | 0.01  | 0.01  | 0.02  | 0.02  | 0.03  | 0.01  |

**Table S5:** Overrepresented pathways using the phosphorylated metabolites identified and quantificated by  $^{31}\text{P}$ -NMR in the ejaculate, seminal plasma and spermatozoa from human.

| Metabolic pathway                        | <i>p</i> -value       | Metabolite                                                                      |
|------------------------------------------|-----------------------|---------------------------------------------------------------------------------|
| Pentose phosphate pathway                | $2.29 \times 10^{-5}$ | X5P   6PG   G6P   S7P                                                           |
| Signal transduction/ cell signaling      | $4.10 \times 10^{-5}$ | NMP   NMPc                                                                      |
| Metabolic pathways                       | $5.63 \times 10^{-5}$ | NADPH   NMP   G6P<br>G1P   Pch   AcP   X5P   6PG   FBP   GPC<br>GPI   GPE   S7P |
| Glycerophospholipid metabolism           | $9.89 \times 10^{-5}$ | Pch   GPC   GPI   GPE   GP(N-biotin)E<br>GP(dimethyl)E   GP(monomethyl)E        |
| Purine metabolism                        | $1.43 \times 10^{-3}$ | NMP   NMPc                                                                      |
| Starch and sucrose metabolism            | $2.46 \times 10^{-3}$ | G6P   G1P                                                                       |
| Glycolysis / Glycogenolysis              | $1.25 \times 10^{-2}$ | G6P   G1P                                                                       |
| Inositol phosphate metabolism            | $1.94 \times 10^{-2}$ | G6P   GPI                                                                       |
| Pentose and glucuronate interconversions | $3.44 \times 10^{-2}$ | G1P   X5P                                                                       |
| Biosynthesis of secondary metabolites    | $3.36 \times 10^{-1}$ | NMP   G6P   G1P   X5P   6PG   S7P                                               |

**Table S6:** Complete list of the relative amounts of each metabolite in spermatozoa (CELL) and seminal plasma (SP) from each donor.

| Metabolite | Donors with normozoospermia                       |      |       |       |       |       |       |       |       |       |                                                       |      |      |       |       |       |       |       |       |       |
|------------|---------------------------------------------------|------|-------|-------|-------|-------|-------|-------|-------|-------|-------------------------------------------------------|------|------|-------|-------|-------|-------|-------|-------|-------|
|            | Relative amounts of metabolites in spermaozoa (%) |      |       |       |       |       |       |       |       |       | Relative amounts of metabolites in seminal plasma (%) |      |      |       |       |       |       |       |       |       |
|            | Mean                                              | SEM  | STD   | 1     | 2     | 3     | 4     | 5     | 6     | 7     | Mean                                                  | SEM  | STD  | 1     | 2     | 3     | 4     | 5     | 6     | 7     |
| Citrate ** | 41.39                                             | 1.99 | 5.26  | 50.92 | 42.09 | 34.62 | 40.94 | 43.90 | 40.46 | 36.77 | 32.42                                                 | 1.32 | 3.49 | 35.88 | 32.66 | 29.78 | 26.92 | 30.78 | 34.23 | 36.67 |
| CHO **     | 33.35                                             | 2.75 | 7.27  | 20.88 | 38.28 | 40.18 | 40.28 | 30.87 | 35.30 | 27.64 | 43.27                                                 | 3.22 | 8.52 | 35.32 | 45.72 | 51.33 | 51.73 | 46.22 | 44.11 | 28.44 |
| Tyr        | 7.48                                              | 0.54 | 1.43  | 7.02  | 7.34  | 9.00  | 5.47  | 7.22  | 9.70  | 6.61  | 9.34                                                  | 0.78 | 2.06 | 13.41 | 9.15  | 8.13  | 9.01  | 10.06 | 8.83  | 6.80  |
| LAC        | 7.34                                              | 2.38 | 6.31  | 9.97  | 3.34  | 3.44  | 3.23  | 6.94  | 3.96  | 20.46 | 6.85                                                  | 2.30 | 6.09 | 5.50  | 4.53  | 3.08  | 4.14  | 5.25  | 4.90  | 20.55 |
| Gln **     | 6.54                                              | 0.41 | 1.08  | 8.54  | 5.31  | 7.20  | 6.27  | 6.75  | 6.00  | 5.70  | 4.16                                                  | 0.19 | 0.50 | 4.51  | 4.00  | 3.97  | 4.12  | 3.53  | 3.93  | 5.08  |
| Phe        | 3.91                                              | 0.38 | 1.01  | 2.68  | 3.64  | 5.56  | 3.81  | 4.32  | 4.57  | 2.82  | 3.96                                                  | 0.32 | 0.86 | 5.38  | 3.95  | 3.71  | 4.08  | 4.16  | 4.01  | 2.46  |
| GPC        | 56.52                                             | 4.69 | 12.41 | 70.67 | 44.95 | 47.58 | 47.65 | 54.07 | 53.74 | 76.96 | 62.81                                                 | 3.67 | 9.70 | 75.42 | 53.75 | 54.67 | 62.64 | 58.85 | 57.08 | 77.27 |
| NMP *      | 18.09                                             | 3.08 | 8.16  | 10.95 | 23.05 | 25.46 | 19.23 | 21.71 | 23.27 | 2.98  | 8.54                                                  | 2.11 | 5.59 | 1.18  | 10.79 | 14.76 | 9.91  | 12.09 | 10.88 | 0.19  |
| S7P&FBP    | 5.95                                              | 1.57 | 4.15  | 0.35  | 8.76  | 8.92  | 10.26 | 6.40  | 6.94  | 0.00  | 1.20                                                  | 0.24 | 0.62 | 2.18  | 1.22  | 1.05  | 1.01  | 1.28  | 1.56  | 0.12  |
| GPE        | 3.84                                              | 0.30 | 0.79  | 3.18  | 4.95  | 3.90  | 4.27  | 3.68  | 2.59  | 4.34  | 2.89                                                  | 0.51 | 1.36 | 3.67  | 2.57  | 2.36  | 1.64  | 1.92  | 2.46  | 5.60  |
| G1P **     | 3.49                                              | 0.65 | 1.73  | 1.41  | 5.52  | 2.04  | 4.91  | 3.49  | 5.17  | 1.90  | 1.23                                                  | 0.14 | 0.38 | 1.80  | 0.93  | 1.14  | 0.94  | 0.96  | 1.12  | 1.74  |
| GPI        | 3.79                                              | 0.76 | 2.02  | 5.30  | 3.05  | 2.60  | 3.21  | 3.29  | 1.50  | 7.59  | 12.70                                                 | 1.50 | 3.96 | 8.65  | 19.37 | 12.23 | 14.74 | 13.13 | 13.41 | 7.38  |
| G6P        | 1.76                                              | 0.31 | 0.83  | 0.71  | 2.48  | 2.42  | 2.78  | 1.36  | 1.77  | 0.81  | 2.43                                                  | 0.33 | 0.89 | 0.50  | 2.50  | 2.79  | 2.50  | 2.80  | 3.20  | 2.74  |
| Pcho **    | 0.90                                              | 0.15 | 0.40  | 1.77  | 0.95  | 0.74  | 0.85  | 0.78  | 0.68  | 0.54  | 0.30                                                  | 0.02 | 0.06 | 0.19  | 0.29  | 0.35  | 0.31  | 0.32  | 0.30  | 0.35  |
| PDE4 **    | 0.80                                              | 0.12 | 0.32  | 0.35  | 1.14  | 1.12  | 1.07  | 0.58  | 0.82  | 0.54  | 0.35                                                  | 0.05 | 0.12 | 0.50  | 0.21  | 0.44  | 0.23  | 0.40  | 0.22  | 0.43  |
| PDE3 **    | 0.88                                              | 0.11 | 0.28  | 1.41  | 0.76  | 0.74  | 0.85  | 0.78  | 0.54  | 1.08  | 0.07                                                  | 0.01 | 0.02 | 0.06  | 0.07  | 0.09  | 0.08  | 0.08  | 0.07  | 0.04  |
| PDE2       | 0.66                                              | 0.09 | 0.23  | 0.35  | 0.57  | 0.74  | 1.07  | 0.78  | 0.54  | 0.54  | 0.56                                                  | 0.05 | 0.14 | 0.56  | 0.64  | 0.70  | 0.39  | 0.72  | 0.52  | 0.39  |



|                  |      |      |      |      |      |      |      |      |      |      |      |      |      |      |      |      |      |      |      |      |
|------------------|------|------|------|------|------|------|------|------|------|------|------|------|------|------|------|------|------|------|------|------|
| GP(dimethyl)E ** | 0.69 | 0.08 | 0.21 | 1.06 | 0.76 | 0.56 | 0.64 | 0.58 | 0.41 | 0.81 | 4.73 | 0.60 | 1.59 | 3.67 | 5.43 | 6.99 | 3.67 | 4.72 | 6.18 | 2.44 |
| GP(N-biotin)E    | 0.45 | 0.09 | 0.25 | 0.00 | 0.57 | 0.74 | 0.43 | 0.58 | 0.54 | 0.27 | 0.34 | 0.04 | 0.10 | 0.19 | 0.36 | 0.26 | 0.31 | 0.48 | 0.45 | 0.31 |
| X5P **           | 0.44 | 0.05 | 0.14 | 0.71 | 0.38 | 0.37 | 0.43 | 0.39 | 0.27 | 0.54 | 0.14 | 0.01 | 0.03 | 0.12 | 0.14 | 0.17 | 0.16 | 0.16 | 0.15 | 0.08 |
| PDE1             | 0.44 | 0.05 | 0.14 | 0.71 | 0.38 | 0.37 | 0.43 | 0.39 | 0.27 | 0.54 | 0.32 | 0.04 | 0.09 | 0.31 | 0.29 | 0.35 | 0.31 | 0.40 | 0.45 | 0.15 |
| 6PG              | 0.34 | 0.07 | 0.18 | 0.35 | 0.57 | 0.37 | 0.43 | 0.39 | 0.27 | 0.00 | 0.45 | 0.09 | 0.23 | 0.25 | 0.50 | 0.52 | 0.39 | 0.56 | 0.82 | 0.12 |
| NMPc             | 0.27 | 0.09 | 0.23 | 0.00 | 0.38 | 0.37 | 0.64 | 0.19 | 0.27 | 0.00 | 0.21 | 0.04 | 0.12 | 0.06 | 0.29 | 0.35 | 0.23 | 0.32 | 0.15 | 0.08 |
| AcP              | 0.25 | 0.06 | 0.15 | 0.00 | 0.38 | 0.37 | 0.43 | 0.19 | 0.14 | 0.27 | 0.19 | 0.04 | 0.10 | 0.06 | 0.21 | 0.35 | 0.16 | 0.24 | 0.22 | 0.08 |
| NADPH            | 0.22 | 0.03 | 0.07 | 0.35 | 0.19 | 0.19 | 0.21 | 0.19 | 0.14 | 0.27 | 0.33 | 0.06 | 0.15 | 0.56 | 0.21 | 0.26 | 0.16 | 0.24 | 0.37 | 0.50 |
| GP(monomethyl)E  | 0.21 | 0.05 | 0.13 | 0.35 | 0.19 | 0.37 | 0.21 | 0.19 | 0.14 | 0.00 | 0.20 | 0.05 | 0.13 | 0.06 | 0.21 | 0.17 | 0.23 | 0.32 | 0.37 | 0.00 |
